# Supplementary material
Source: Springer Nature journal article supplement (https://www.springermedizin.de/resource/supplementary/12936_2010_1652_MOESM2_ESM.pdf/9542282)

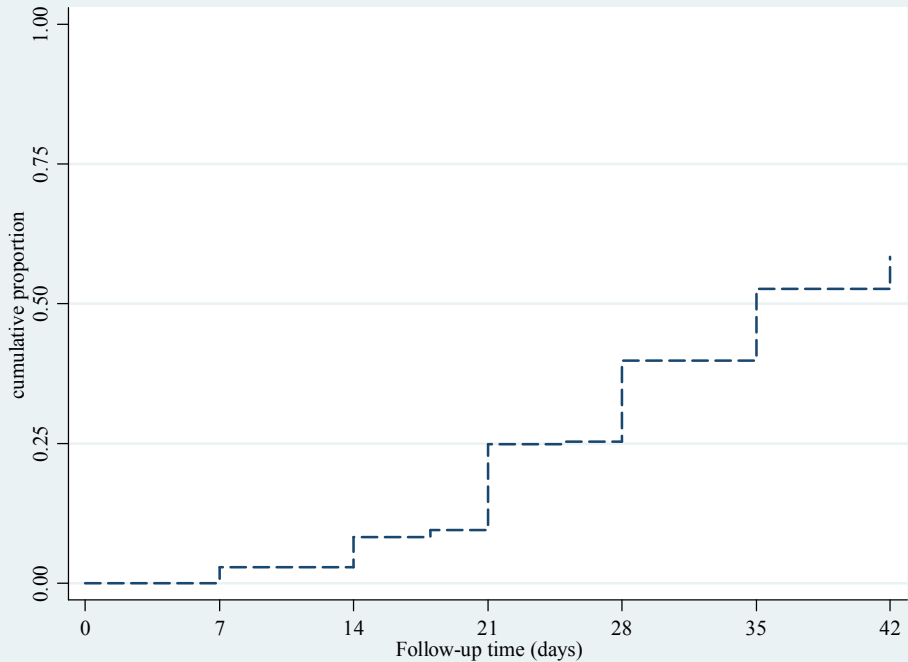

Number at risk

244

244

235

218

180

145

114

Supplement: MOESM2 [file 9542282]
